# Supplementary material for: Plasma Fatty Acid Ratios Affect Blood Gene Expression Profiles - A Cross-Sectional Study of the Norwegian Women and Cancer Post-Genome Cohort
Source: PLoS One. 2013 Jun 25;8(6):e67270. doi: 10.1371/journal.pone.0067270 (PMC3692510; doi:10.1371/journal.pone.0067270)
Supplement: Table S2 — Differentially expressed genes according to LA/ALA ratio (t-tests, p<0.01). (XLSX) [file pone.0067270.s003.xlsx]

## Sheet: Sheet1
Olsen, KS et al.
Blood transcriptomics: Serum fatty acid ratios affect blood gene expression profiles - A cross-sectional study of the Norwegian Women and Cancer Post-genome Cohort
Suppl. table S2
Differentially expressed genes according to LA/ALA (t-tests, adjusted p-value<0.01)
ABI ID	BH_adj_pval	mean diff	low	high	Gene Symbol	Gene name
177196	0.00832034	-0.453655	10.6398	10.1862	ACOT1	acyl-CoA thioesterase 1
126241	0.00920198	-0.339993	17.4459	17.1059	ADIPOR1	adiponectin receptor 1
224660	0.00832034	-0.538252	9.96055	9.4223	AGGF1	angiogenic factor with G patch and FHA domains 1
112571	0.00929536	0.475542	11.17	11.6456	AMPD2	adenosine monophosphate deaminase 2 (isoform L)
195478	0.00916143	-0.383927	10.0315	9.64757	ANAPC1	anaphase promoting complex subunit 1; similar to anaphase promoting complex subunit 1
102558	0.00916143	0.643806	11.6928	12.3366	ANPEP	alanyl (membrane) aminopeptidase
170701	0.009978	0.407538	10.1723	10.5798	ARSA	arylsulfatase A
166802	0.00916143	-0.244816	11.8261	11.5813	ASNS	asparagine synthetase
187978	0.00980955	0.440699	11.0137	11.4544	ASPRV1	aspartic peptidase, retroviral-like 1
114409	0.00832034	-0.236837	12.1736	11.9368	ATCAY	ataxia, cerebellar, Cayman type
151844	0.00929536	0.291654	13.839	14.1306	ATP6V1B2	ATPase, H+ transporting, lysosomal 56/58kDa, V1 subunit B2
150758	0.00832034	0.480422	10.604	11.0844	B9D2	B9 protein domain 2
105279	0.00929536	0.373038	9.77381	10.1469	BAGE3	B melanoma antigen family, member 2; B melanoma antigen family, member 3; B melanoma antigen family, member 4; B melanoma antigen family, member 5
198318	0.00920198	0.375652	17.7631	18.1387	BASP1	brain abundant, membrane attached signal protein 1
103435	0.00951842	-0.293165	10.4915	10.1984	C16orf88	chromosome 16 open reading frame 88
146237	0.00964298	-0.245868	10.9511	10.7052	C1orf102
222639	0.00950157	0.579834	9.39966	9.9795	C20orf200	chromosome 20 open reading frame 200
115087	0.00920198	0.268313	11.5278	11.7961	C21orf7	chromosome 21 open reading frame 7
116986	0.00832034	-0.335664	11.5545	11.2189	C2orf44	chromosome 2 open reading frame 44
106486	0.0088245	0.347093	11.2552	11.6023	C2orf68	chromosome 2 open reading frame 68
196942	0.00929536	0.557838	12.2673	12.8251	CA4	carbonic anhydrase IV
149818	0.00871338	-0.329046	10.6965	10.3674	CACNG8	calcium channel, voltage-dependent, gamma subunit 8
127383	0.00832034	0.411492	13.1528	13.5643	CASS4	Cas scaffolding protein family member 4
108110	0.00832034	0.420477	9.58751	10.008	CCKAR	cholecystokinin A receptor
167437	0.00916143	0.492461	9.26737	9.75984	CCL7	chemokine (C-C motif) ligand 7
156018	0.00916143	-0.376629	11.0659	10.6893	CCNG1	cyclin G1
180503	0.00916143	-0.517479	13.0466	12.5291	CCR5	chemokine (C-C motif) receptor 5
166481	0.00916143	0.361386	12.3698	12.7312	CD2BP2	CD2 (cytoplasmic tail) binding protein 2
114892	0.00929536	0.281323	13.3059	13.5872	CDAN1	congenital dyserythropoietic anemia, type I
104276	0.00969316	0.492893	14.378	14.8709	CLEC4E	C-type lectin domain family 4, member E
215843	0.00958773	0.367775	11.2916	11.6594	CLN6	ceroid-lipofuscinosis, neuronal 6, late infantile, variant
185846	0.00832034	0.432739	10.736	11.1687	CORO1B	coronin, actin binding protein, 1B
100989	0.00832034	1.35687	9.81626	11.1731	CPA3	carboxypeptidase A3 (mast cell)
181617	0.00959112	-0.249383	12.2601	12.0107	CREBL2	cAMP responsive element binding protein-like 2
196102	0.00832034	0.42271	10.499	10.9218	CRK	v-crk sarcoma virus CT10 oncogene homolog (avian)
208454	0.00832034	-0.536369	11.1615	10.6251	CRTAM	cytotoxic and regulatory T cell molecule
188846	0.00916143	0.292515	14.2027	14.4952	CTBS	chitobiase, di-N-acetyl-
142147	0.00965687	-0.340552	10.1345	9.79395	CYP4F22	cytochrome P450, family 4, subfamily F, polypeptide 22
114009	0.00929536	-0.324597	12.876	12.5514	DCP1B	DCP1 decapping enzyme homolog B (S. cerevisiae)
211972	0.00916143	-0.239329	11.9161	11.6768	DDX18	DEAD (Asp-Glu-Ala-Asp) box polypeptide 18
167436	0.00980786	-0.34921	10.2546	9.90536	DDX20	DEAD (Asp-Glu-Ala-Asp) box polypeptide 20
177477	0.009978	0.434301	10.7654	11.1997	DDX55	DEAD (Asp-Glu-Ala-Asp) box polypeptide 55
204688	0.00963875	0.339604	14.2274	14.567	DGAT2	diacylglycerol O-acyltransferase homolog 2 (mouse)
181200	0.00832034	0.477203	10.9633	11.4405	DIRC2	disrupted in renal carcinoma 2
105113	0.00991721	0.421209	10.4778	10.899	DOCK5	dedicator of cytokinesis 5
204989	0.00951842	0.359104	10.9592	11.3183	DOK1	docking protein 1-like protein; docking protein 1, 62kDa (downstream of tyrosine kinase 1)
219112	0.00969316	0.586042	9.06395	9.64999	DPY19L2	dpy-19-like 2 (C. elegans)
235719	0.00832034	0.478194	10.4346	10.9128	EIF2C4	eukaryotic translation initiation factor 2C, 4
214951	0.00929536	0.5387	10.2999	10.8386	ELA3A
203249	0.00929536	0.378589	11.0666	11.4452	ENTPD1	ectonucleoside triphosphate diphosphohydrolase 1
113467	0.00832034	-0.517976	15.596	15.078	EPB42	erythrocyte membrane protein band 4.2
205827	0.00969316	0.566746	9.94573	10.5125	ERGIC1	endoplasmic reticulum-golgi intermediate compartment (ERGIC) 1
149090	0.00916143	0.332387	14.3117	14.6441	ERICH1	glutamate-rich 1
169478	0.009978	-0.429683	10.0111	9.58142	EXOC8	exocyst complex component 8
150137	0.00832034	0.605394	10.0109	10.6163	FABP4	fatty acid binding protein 4, adipocyte
102396	0.00916143	-0.374117	15.3647	14.9905	FAM104A	family with sequence similarity 104, member A
174755	0.00920198	0.267914	13.1679	13.4359	FAM53C	family with sequence similarity 53, member C
161432	0.00916143	-0.688977	9.64327	8.9543	FAM63B	family with sequence similarity 63, member B
121117	0.00920198	0.538333	13.3682	13.9065	FCGRT	Fc fragment of IgG, receptor, transporter, alpha
176815	0.00969316	-0.253641	11.841	11.5873	FEN1	flap structure-specific endonuclease 1
183378	0.00929536	0.302231	10.2736	10.5759	FOLR2	folate receptor 2 (fetal)
186435	0.00920198	0.396784	17.5552	17.952	FPR1	formyl peptide receptor 1
174493	0.00929536	0.354702	13.0984	13.4532	FPR2	formyl peptide receptor 2
209660	0.00916143	-0.305144	11.531	11.2259	FYTTD1	forty-two-three domain containing 1
110602	0.00951842	0.29477	13.8598	14.1546	GALNAC4S-6ST	carbohydrate (N-acetylgalactosamine 4-sulfate 6-O) sulfotransferase 15
157771	0.00916143	0.254198	11.6664	11.9206	GBX2	gastrulation brain homeobox 2
125012	0.00832034	-0.403514	12.1491	11.7456	GCC2	GRIP and coiled-coil domain containing 2
121984	0.00832034	-0.685807	12.0155	11.3297	GFI1	growth factor independent 1 transcription repressor
163121	0.00916143	0.441916	10.4564	10.8983	GINS2	GINS complex subunit 2 (Psf2 homolog)
184881	0.009978	0.321176	12.016	12.3372	GK	glycerol kinase 3 pseudogene; glycerol kinase
185381	0.00832034	0.634901	10.1929	10.8278	GLT1D1	glycosyltransferase 1 domain containing 1
180184	0.00920198	0.363221	16.961	17.3242	GMFG	glia maturation factor, gamma
174153	0.00929536	-0.39185	10.802	10.4102	GOLT1A	golgi transport 1 homolog A (S. cerevisiae)
193676	0.00833459	0.321497	12.1633	12.4848	GTF2I	general transcription factor II, i, pseudogene
170501	0.00832034	-0.34362	15.9619	15.6183	GUK1	guanylate kinase 1
145583	0.00832034	-0.332893	17.4034	17.0706	GYPC	glycophorin C (Gerbich blood group)
149248	0.00832034	-0.364112	15.0199	14.6558	HAGH	hydroxyacylglutathione hydrolase
181086	0.00916143	0.398346	11.7772	12.1755	HAL	histidine ammonia-lyase
209485	0.00951842	0.162025	14.731	14.893	HCV F-transactivated protein 1
194873	0.00832034	1.40872	9.7794	11.1881	HDC	histidine decarboxylase
170038	0.00920198	0.252713	14.6517	14.9044	HEBP2	heme binding protein 2
206232	0.00966429	0.433723	13.2304	13.6641	HIST1H1C	histone cluster 1, H1c
184281	0.00920198	0.319293	12.2314	12.5507	HIST1H2AD	histone cluster 1, H3j; histone cluster 1, H3i; histone cluster 1, H3h; histone cluster 1, H3g; histone cluster 1, H3f; histone cluster 1, H3e; histone cluster 1, H3d; histone cluster 1, H3c; histone cluster 1, H3b; histone cluster 1, H3a; histone cluster 1, H2ad; histone cluster 2, H3a; histone cluster 2, H3c; histone cluster 2, H3d
138287	0.00916143	0.335409	12.5115	12.8469	HIST1H2BJ	histone cluster 1, H2bj
193947	0.00832034	0.300216	12.6035	12.9037	HIST1H2BM	histone cluster 1, H2bm
149647	0.00951842	0.317406	15.7271	16.0445	HIST2H2AA3	histone cluster 2, H2aa3; histone cluster 2, H2aa4
127609	0.00965687	0.315967	14.4381	14.7541	HIST3H3	histone cluster 3, H3
156653	0.00920198	-0.429075	11.7694	11.3403	HNRNPL	similar to heterogeneous nuclear ribonucleoprotein L-like; heterogeneous nuclear ribonucleoprotein L
220847	0.00916143	0.494825	9.67786	10.1727	HOXC12	homeobox C12
226440	0.00832034	-0.300775	10.9557	10.6549	hypothetical protein
112888	0.00969316	-0.751122	11.5681	10.817	IFIT1L	interferon-induced protein with tetratricopeptide repeats 1B
195577	0.00832034	0.517458	17.5648	18.0823	IFITM3	interferon induced transmembrane protein 3 (1-8U)
200014	0.00832034	0.362684	13.3533	13.7159	IL10RB	interleukin 10 receptor, beta
186009	0.00916143	0.443042	14.9441	15.3872	IL1R2	interleukin 1 receptor, type II
104745	0.00832034	-0.419497	10.8403	10.4208	INPP4B	inositol polyphosphate-4-phosphatase, type II, 105kDa
139346	0.00929536	0.463385	12.3754	12.8388	ISL2	ISL LIM homeobox 2
216566	0.00920198	-0.449477	11.2982	10.8487	ITPR3	inositol 1,4,5-triphosphate receptor, type 3
157046	0.00965687	-0.34638	11.2418	10.8954	karyopherin alpha-2 subunit like
135422	0.00929536	0.391658	9.85433	10.246	KCNU1	potassium channel, subfamily U, member 1
158049	0.00916143	-0.472195	10.5499	10.0777	KIAA0564	KIAA0564
113852	0.009978	-0.371394	11.3998	11.0284	KIAA0831	KIAA0831
188801	0.00916143	-0.578083	13.4658	12.8877	KLRG1	killer cell lectin-like receptor subfamily G, member 1
122027	0.00832034	-0.347672	12.2022	11.8546	LANCL1	LanC lantibiotic synthetase component C-like 1 (bacterial)
192802	0.00916143	-0.393592	15.6651	15.2716	LBH	limb bud and heart development homolog (mouse)
192374	0.009978	-0.257315	11.8974	11.6401	LRPPRC	leucine-rich PPR-motif containing
212496	0.0088245	-0.290335	14.4301	14.1398	MAF1	MAF1 homolog (S. cerevisiae)
187717	0.0088245	-0.34868	10.0363	9.68759	MAGT1	magnesium transporter 1
213342	0.00969316	0.455039	12.3553	12.8103	MANSC1	MANSC domain containing 1
10715781	0.00929161	-0.453087	9.99848	9.54539	MAP6	microtubule-associated protein 6
229698	0.0088245	-0.659556	10.1046	9.44508	MATR3	matrin 3
209973	0.00833459	-0.326482	11.3993	11.0728	MCM3	minichromosome maintenance complex component 3
197624	0.00832034	0.395227	12.0631	12.4583	METRNL	meteorin, glial cell differentiation regulator-like; similar to meteorin, glial cell differentiation regulator-like
188640	0.00916143	-0.695796	10.2943	9.59853	MINPP1	multiple inositol polyphosphate histidine phosphatase, 1
227814	0.00929536	-0.38832	15.3804	14.9921	MKRN1	makorin ring finger protein pseudogene 6; makorin ring finger protein 1
163166	0.00929161	0.374722	11.8059	12.1806	MLF2	myeloid leukemia factor 2
195045	0.00916143	0.409645	9.7599	10.1695	MLL	myeloid/lymphoid or mixed-lineage leukemia (trithorax homolog, Drosophila)
122196	0.00974002	-0.183615	11.7794	11.5958	MRPS35	mitochondrial ribosomal protein S35
182643	0.00832034	0.998088	9.79393	10.792	MS4A2	membrane-spanning 4-domains, subfamily A, member 2 (Fc fragment of IgE, high affinity I, receptor for; beta polypeptide)
112249	0.00916143	-0.477088	10.4471	9.97003	MTR	5-methyltetrahydrofolate-homocysteine methyltransferase
207803	0.00916143	-0.625625	11.4297	10.8041	MYBL1	v-myb myeloblastosis viral oncogene homolog (avian)-like 1
201601	0.00832034	1.18028	9.38518	10.5655	MYBPHL	myosin binding protein H-like
171663	0.00916143	-0.464609	14.8396	14.375	MYL4	myosin, light chain 4, alkali; atrial, embryonic
176322	0.00916143	0.249935	13.0914	13.3413	NBPF10	neuroblastoma breakpoint family, member 15; neuroblastoma breakpoint family, member 14; neuroblastoma breakpoint family, member 9; neuroblastoma breakpoint family, member 11; neuroblastoma breakpoint family, member 11-like; neuroblastoma breakpoint family, member 10; neuroblastoma breakpoint family, member 12; neuroblastoma breakpoint family, member 20; neuroblastoma breakpoint family, member 1; …
116214	0.00958773	-0.420249	13.4856	13.0654	NELL2	NEL-like 2 (chicken)
234890	0.00951842	-0.507483	17.6575	17.15	NEUROG2	neurogenin 2
203863	0.00951842	0.305578	13.5947	13.9003	NFIL3	nuclear factor, interleukin 3 regulated
180149	0.00920198	-0.276012	13.06	12.784	NLGN2	neuroligin 2
125296	0.00920198	0.551383	9.12867	9.68006	NPFFR1	neuropeptide FF receptor 1
211955	0.00832034	-0.585402	10.6615	10.0761	NR2C2AP	nuclear receptor 2C2-associated protein
124033	0.00916143	0.265956	11.479	11.745	NT5C2	5'-nucleotidase, cytosolic II
169345	0.009978	-0.249055	11.7731	11.524	NUDCD3	NudC domain containing 3
129441	0.00832034	-0.353396	15.956	15.6026	OPTN	optineurin
702434	0.00832034	-0.695313	11.784	11.0886	OR2W3	olfactory receptor, family 2, subfamily T, member 8; olfactory receptor, family 2, subfamily W, member 3
171625	0.00916143	0.37021	12.718	13.0882	PGM2	phosphoglucomutase 2
195337	0.00929536	-0.364216	14.2769	13.9127	PIP4K2A	phosphatidylinositol-5-phosphate 4-kinase, type II, alpha
208060	0.00871338	0.362496	12.9537	13.3162	PLAUR	plasminogen activator, urokinase receptor
102211	0.00969316	-0.496404	9.98258	9.48618	PMS1	PMS1 postmeiotic segregation increased 1 (S. cerevisiae)
153575	0.00951842	-0.276428	11.9761	11.6996	PPP3CC	protein phosphatase 3 (formerly 2B), catalytic subunit, gamma isoform
129668	0.009978	0.28251	11.9103	12.1928	PPP4R1	protein phosphatase 4, regulatory subunit 1
167444	0.00974565	0.596755	9.21355	9.8103	PRR4	proline rich 4 (lacrimal)
112567	0.00965687	0.529097	13.7375	14.2666	PTAFR	platelet-activating factor receptor
128131	0.00929161	-0.297849	12.8956	12.5978	PTPN7	protein tyrosine phosphatase, non-receptor type 7
138013	0.00973656	-0.326877	12.2793	11.9525	PYROXD1	pyridine nucleotide-disulphide oxidoreductase domain 1
190571	0.00929536	0.298516	14.2684	14.567	RAB2A	RAB2A, member RAS oncogene family
191530	0.00965687	0.260574	13.3604	13.6209	RALB	v-ral simian leukemia viral oncogene homolog B (ras related; GTP binding protein)
129740	0.00832034	0.496091	13.1611	13.6572	RBP7	retinol binding protein 7, cellular
178139	0.00916143	0.37846	13.3385	13.717	RGS19	regulator of G-protein signaling 19
116793	0.00832034	0.595958	14.1793	14.7752	RGS2	regulator of G-protein signaling 2, 24kDa
158499	0.00980955	-0.253053	11.0678	10.8148	RIBC2	RIB43A domain with coiled-coils 2
110449	0.00929536	0.441682	10.0431	10.4848	ROPN1B	ropporin, rhophilin associated protein 1B
183687	0.00916143	0.537552	10.861	11.3985	ROPN1L	ropporin 1-like
112476	0.00969316	0.502132	9.20249	9.70462	RRAGD	Ras-related GTP binding D
162558	0.0095064	-0.324534	11.3685	11.044	RRM1	ribonucleotide reductase M1
164104	0.00929536	0.275724	15.1085	15.3842	RXRA	retinoid X receptor, alpha
145550	0.00969316	0.277326	19.0149	19.2923	S100A11	S100 calcium binding protein A11; S100 calcium binding protein A11 pseudogene
154326	0.00916143	0.306558	17.7323	18.0388	S100A6	S100 calcium binding protein A6
214501	0.00920198	0.518905	10.0372	10.5561	S100Z	S100 calcium binding protein Z
165679	0.00920198	-0.401093	11.6445	11.2434	SAMD3	sterile alpha motif domain containing 3
213781	0.0095064	0.358611	11.401	11.7596	SDF4	stromal cell derived factor 4
146482	0.00929536	0.566912	10.26	10.8269	SH2B2	SH2B adaptor protein 2
147339	0.00920198	-0.430461	10.6836	10.2531	SHQ1	SHQ1 homolog (S. cerevisiae)
220354	0.00929536	-0.343745	12.2468	11.9031	similar to hypothetical protein MGC49416 (EC:3.-.-.-)
165607	0.00969316	0.262911	14.3063	14.5692	SLC11A1	solute carrier family 11 (proton-coupled divalent metal ion transporters), member 1
149707	0.00916143	0.357227	13.689	14.0462	SLC19A1	solute carrier family 19 (folate transporter), member 1
206544	0.00832034	0.618294	9.67129	10.2896	SLC22A9	solute carrier family 22 (organic anion transporter), member 9
219146	0.00965687	-0.291381	11.525	11.2337	SLC6A18	solute carrier family 6, member 18
170285	0.00974565	-0.630155	16.8954	16.2653	SNCA	synuclein, alpha (non A4 component of amyloid precursor)
181922	0.00916143	-0.57037	10.4782	9.9078	SNX15	sorting nexin 15
189841	0.00974002	-0.221806	12.1798	11.958	SPATA22	spermatogenesis associated 22
221741	0.00916143	-0.450853	9.68966	9.23881	SPECC1
174543	0.00916143	-0.406213	10.276	9.86983	SPSB1	splA/ryanodine receptor domain and SOCS box containing 1
133333	0.009978	0.247309	17.9558	18.2031	SRGN	serglycin
142288	0.009978	-0.369448	11.7555	11.3861	SRRD	SRR1 domain containing
123115	0.00980955	-0.3215	12.7079	12.3864	ST6GALNAC4	ST6 (alpha-N-acetyl-neuraminyl-2,3-beta-galactosyl-1,3)-N-acetylgalactosaminide alpha-2,6-sialyltransferase 4
158699	0.00832034	-0.351058	14.6155	14.2644	STAT4	signal transducer and activator of transcription 4
116303	0.00916143	0.328321	14.2173	14.5456	SULF2	sulfatase 2
212648	0.00929536	-0.536979	10.0209	9.48394	TADA1L
155101	0.00920198	0.514573	9.36307	9.87764	TBC1D30	TBC1 domain family, member 30
132590	0.00916143	1.1982	9.23041	10.4286	TCHHL1	trichohyalin-like 1
184655	0.00832881	0.371956	12.0426	12.4146	TLR8	toll-like receptor 8
105353	0.00951842	0.570081	9.9512	10.5213	TMC4	transmembrane channel-like 4
138581	0.00916143	-0.365205	11.7824	11.4172	TMCC2	transmembrane and coiled-coil domain family 2
143933	0.00916143	0.457053	11.4377	11.8947	TMCC3	transmembrane and coiled-coil domain family 3
206786	0.00965687	0.371674	11.7513	12.123	TMEM120A	transmembrane protein 120A
202078	0.00974565	-0.465863	13.8717	13.4058	TMEM123	transmembrane protein 123
132060	0.00832034	0.270462	12.9468	13.2173	TMEM127	transmembrane protein 127
205179	0.00832034	-0.304746	11.4259	11.1212	TMEM138	transmembrane protein 138
182763	0.00929536	-0.305983	10.7461	10.4401	TMEM62	transmembrane protein 62
104200	0.00916143	-0.219764	11.6588	11.439	TRAPPC2	trafficking protein particle complex 2; trafficking protein particle complex 2 pseudogene 1
154230	0.00965687	0.397696	14.6229	15.0206	TREM1	triggering receptor expressed on myeloid cells 1
236837	0.00920198	0.30418	13.0043	13.3085	TRIM17	tripartite motif-containing 17
394995	0.00969316	-0.312294	11.4411	11.1288	TRPV3	transient receptor potential cation channel, subfamily V, member 3
152777	0.00929536	0.294137	15.1208	15.415	TSEN34	tRNA splicing endonuclease 34 homolog (S. cerevisiae)
178683	0.00993462	-0.446534	12.531	12.0845	TUBG1	tubulin, gamma 1; similar to Tubulin, gamma 1
179329	0.00832034	0.369796	17.6309	18.0007	TYROBP	TYRO protein tyrosine kinase binding protein
208303	0.009978	-0.533203	10.0102	9.47701	UBE2T	ubiquitin-conjugating enzyme E2T (putative)
332119	0.00916143	-0.387488	13.7731	13.3856	UHMK1	U2AF homology motif (UHM) kinase 1
109540	0.00950273	0.42931	10.812	11.2413	UHRF1BP1L	UHRF1 binding protein 1-like
149070	0.00832034	0.518622	13.1449	13.6636	UTF1	undifferentiated embryonic cell transcription factor 1
130288	0.00832034	-0.468179	10.9509	10.4827	WDR7	WD repeat domain 7
202070	0.00916143	-0.304292	11.1141	10.8098	ZC3HC1	zinc finger, C3HC-type containing 1
182917	0.00965687	-0.420364	9.75818	9.33781	ZFYVE1	zinc finger, FYVE domain containing 1
108930	0.00929536	0.343455	9.46691	9.81036	ZNF169	zinc finger protein 169
221425	0.00965687	0.396948	9.22821	9.62516	ZNF434	zinc finger protein 434
124882	0.00832034	0.632573	10.0659	10.6985	ZNF558	zinc finger protein 558
219763	0.00920198	-0.282259	10.5566	10.2743	ZNF564	zinc finger protein 564
200021	0.00856089	-0.283522	11.8582	11.5747	ZNF766	zinc finger protein 766
124354	0.00951842	-0.277902	13.9065	13.6286	ZNF91	zinc finger protein 91
